# Supplementary material for: The chitin synthase FgChs2 and other FgChss co-regulate vegetative development and virulence in F. graminearum
Source: PubMed Central journal article supplement (PMC5057161; doi:10.1038/srep34975), 2016-10-11
Supplement: srep34975-s1.pdf [file srep34975-s1.pdf]

**The chitin synthase FgChs2 and other FgChss co-regulate vegetative development and virulence in *F. graminearum***

Zunyong Liu<sup>1</sup>, Xiaoping Zhang<sup>1</sup>, Xin Liu<sup>2</sup>, Chaoyu Fu<sup>1</sup>, Xinyue Han<sup>1</sup>, Yanni Yin<sup>1</sup> & Zhonghua Ma<sup>1,3</sup>

<sup>1</sup>Institute of Biotechnology, Zhejiang University, 866 Yuhangtang Road, Hangzhou 310058, China. <sup>2</sup>Institute of Food Quality and Safety, Jiangsu Academy of Agricultural Sciences, 210014, China. <sup>3</sup>State Key Laboratory of Rice Biology, Zhejiang University, 866 Yuhangtang Road, Hangzhou 310058, China. Correspondence and requests for materials should be addressed to Yanni Yin (email: [ynyin@zju.edu.cn](mailto:ynyin@zju.edu.cn)) or Zhonghua Ma ([zhma@zju.edu.cn](mailto:zhma@zju.edu.cn)).

## SUPPORTING INFORMATION

**Figure S1.** Generation and identification of the *FgChs* single and double deletion mutants, and the complemented strain. **(a)** Gene deletion strategy for *FgChs2*. The hygromycin resistance cassette (*HPH*) is denoted by the large black arrow. Primer binding sites are indicated by arrows (see Table S1 for the primer sequences). **(b)** Southern blot hybridization analysis of *FgChs2* locus in the wild-type PH-1, *FgChs2* deletion mutant  $\Delta FgChs2$ , and the complemented strain  $\Delta FgChs2$ -C, using the 1.1-kb upstream fragment of *FgChs2* as a probe. Genomic DNA preparation of each strain was digested with *Pvu* I. **(c)** Southern blot hybridization analysis of *NEO* locus in PH-1 and  $\Delta FgChs2$ -C using the 1.1-kb *NEO* fragment as a probe. Genomic DNA preparation of each strain was digested with *Stu* I. **(d)** Gene deletion strategy for *FgChs1*, *FgChs3a*, *FgChs4*, *FgChs7*, *FgChs5* and *FgChs6*. Genomic DNA preparations from deletion mutants  $\Delta FgChs1$ ,  $\Delta FgChs3a$ ,  $\Delta FgChs4$ ,  $\Delta FgChs7$ ,  $\Delta FgChs5$  and  $\Delta FgChs6$  were digested with *Stu* I, *Hind* III, *Xho* I, *Stu* I, *Nru* I and *EcoR* V respectively. Genomic DNA preparations from double deletion mutants  $\Delta FgChs2/1$ ,  $\Delta FgChs2/3a$ ,  $\Delta FgChs2/4$ ,  $\Delta FgChs2/7$ ,  $\Delta FgChs2/5$  and  $\Delta FgChs2/6$  were digested with *Stu* I, *Hind* III, *Xho* I, *Xho* I, *Bgl* II and *Nru* I respectively. **(e)** The 1.3-kb *HPH* fragment was used as a probe in the Southern blot hybridization analyses of the single deletion mutants  $\Delta FgChs1$ ,  $\Delta FgChs4$ ,  $\Delta FgChs7$ ,  $\Delta FgChs5$  and  $\Delta FgChs6$ . **(f)** The 1.1-kb *NEO* fragment was used as a probe in the Southern blot hybridization analyses of the double deletion mutants  $\Delta FgChs2/1$ ,  $\Delta FgChs2/3a$ ,  $\Delta FgChs2/4$ ,  $\Delta FgChs2/7$ ,  $\Delta FgChs2/5$  and  $\Delta FgChs2/6$ .

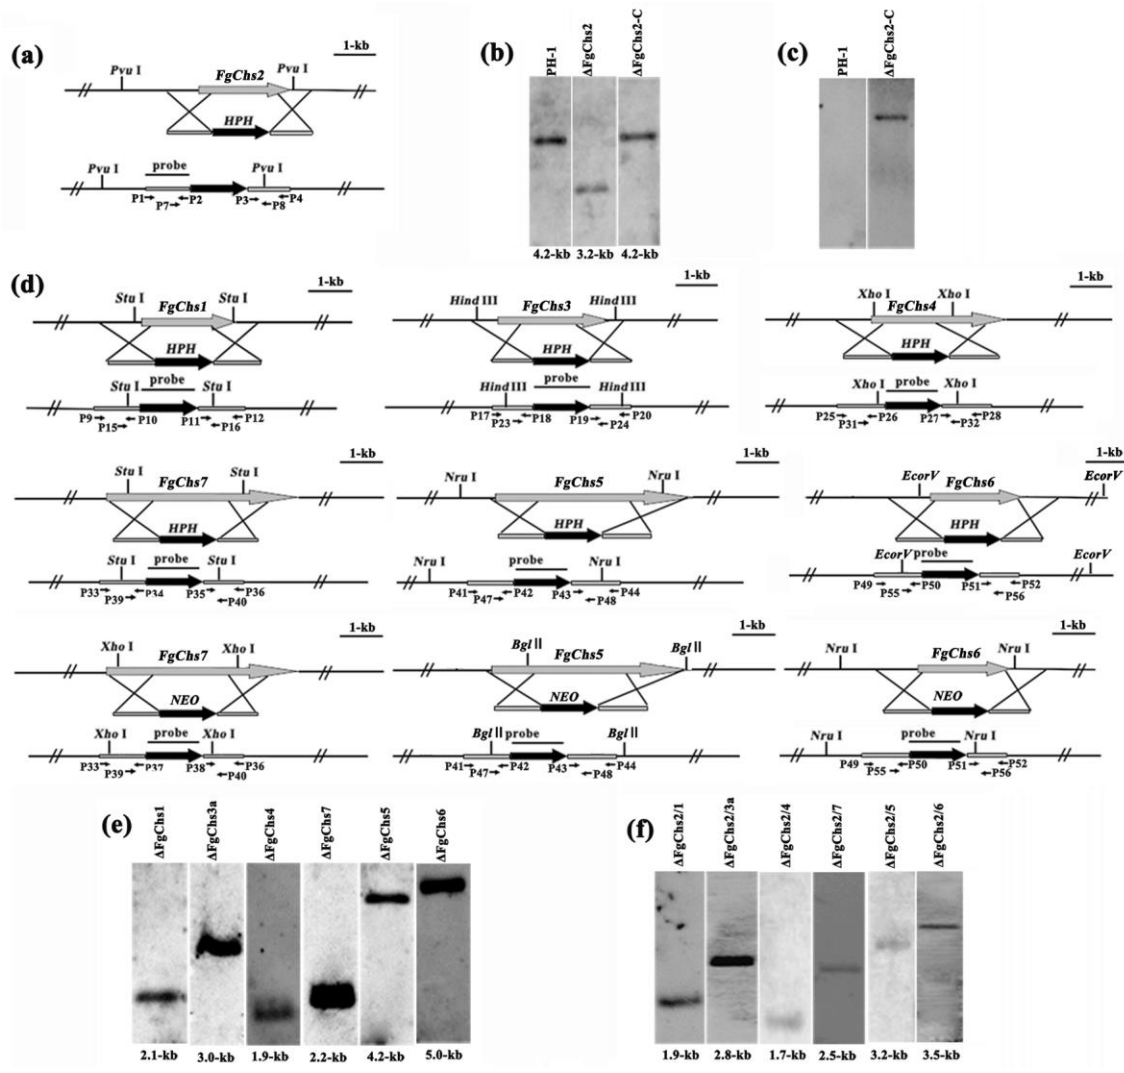

**Figure S2.** Effect of *FgChs* deletion on conidial germination in *F. graminearum*. Comparisons in conidial germination among the wild-type PH-1, *FgChs* deletion mutants ( $\Delta FgChs1-7$ ), double deletion mutants of *FgChs2* and other *FgChss* ( $\Delta FgChs2/1-7$ ), and the complemented strain  $\Delta FgChs2-C$ . After incubation in 2% (w/v) sucrose for 4 hrs, conidial germination of 150 conidia was examined for each strain.

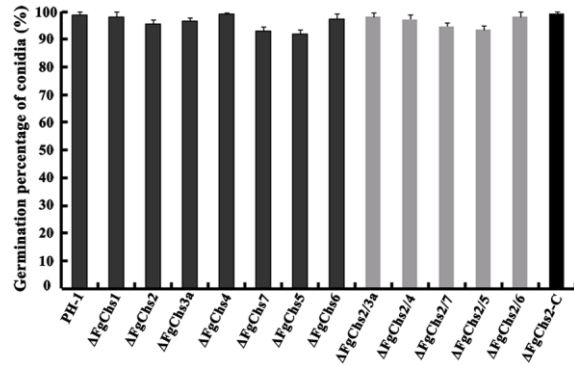

**Figure S3.** Penetration assays of *FgChs7*, *FgChs5*, *FgChs2/1*, *FgChs2/7* and *FgChs2/5* deletion mutants into cellophane membrane. Fungal colonies of each strain were grown at 25 °C for 3 days on top of cellophane membranes placed on minimal medium (Before). And then, the cellophane membranes with the fungal colonies were removed, and the plates were incubated at 25 °C for two additional days to examine the presence of mycelial growth on the plate, indicating penetration of the cellophane (After).

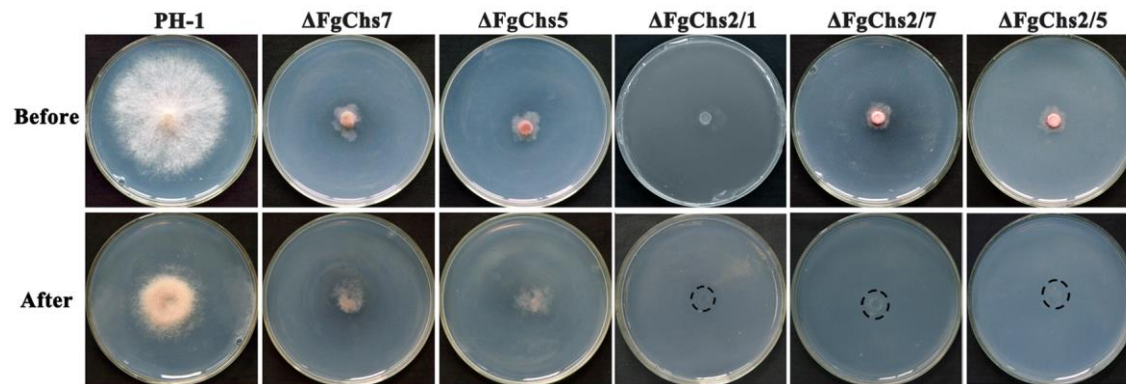

**Table S1 PCR primers used in this study**

| Primer         | Sequence (5'-3')                                                          | Relevant characteristics                                                                                          |
|----------------|---------------------------------------------------------------------------|-------------------------------------------------------------------------------------------------------------------|
| P1<br>P2       | CAACACCTTCTCCTCTCAACC<br>CAAAATAGGCATTGATGTGTTGACCTCCTTGTCGGGATCTTACTCCA  | PCR primers to amplify <i>FgChs2</i> upstream fragment for the construction of <i>FgChs2</i> deletion mutants     |
| P3<br>P4       | CTCGTCCGAGGGCAAAGGAATAGAGTAGTATTCTCGGCATGGCTGTGT<br>TGAGCGCTTCGGTGACTTCT  | PCR primers to amplify <i>FgChs2</i> downstream fragment for the construction of <i>FgChs2</i> deletion mutants   |
| P5             | AGACACACTAAACGAAGGCGA                                                     | PCR primers for identification of <i>FgChs2</i> deletion transformants                                            |
| P6<br>P7<br>P8 | TTGATCACATTAAGGATGGCA<br>ACACTCAAGCGAACATTCACA<br>TGGTTATAGCATGGAAGTGGG   | PCR primers to amplify upstream-HPH-downstream fragment for the construction of <i>FgChs2</i> deletion mutants    |
| P9<br>P10      | TTACGCATCTCTTCTCGCTGA<br>CAAAATAGGCATTGATGTGTTGACCTCCTACAGCTGCGTTGAGGCTCA | PCR primers to amplify <i>FgChs1</i> upstream fragment for the construction of <i>FgChs1</i> deletion mutants     |
| P11<br>P12     | CTCGTCCGAGGGCAAAGGAATAGAGTAGGACTTGGATGCGCAATATCA<br>CTTTGCAAACCTTCACCTC   | PCR primers to amplify <i>FgChs1</i> downstream fragment for the construction of <i>FgChs1</i> deletion mutants   |
| P13<br>P14     | TTCAATTGCCTTCAGACGAC<br>ATCCAAAGAAGGACAACACCG                             | PCR primers for identification of <i>FgChs1</i> deletion transformants                                            |
| P15<br>P16     | TCTGTGCATTCATCGTACCA<br>TTTTGCGGGATGTTATGTGG                              | PCR primers to amplify upstream-HPH-downstream fragment for the construction of <i>FgChs1</i> deletion mutants    |
| P17<br>P18     | GGATGGAGGGATGGAAATGTA<br>CAAAATAGGCATTGATGTGTTGACCTCCTGTACGGTGCATGACGGAAA | PCR primers to amplify <i>FgChs3a</i> upstream fragment for the construction of <i>FgChs3a</i> deletion mutants   |
| P19<br>P20     | CTCGTCCGAGGGCAAAGGAATAGAGTAGCCCATGTATTTCCGTTTCT<br>TCGGAAGTTTCACATTCAAAG  | PCR primers to amplify <i>FgChs3a</i> downstream fragment for the construction of <i>FgChs3a</i> deletion mutants |
| P21<br>P22     | TCATTATCCTCCTGACCTCCA<br>AAGACATTCATCCCCAAGAAG                            | PCR primers for identification of <i>FgChs3a</i> deletion transformants                                           |
| P23<br>P24     | AAAGAACGAGGTTTCTTGCCA<br>TTCGAGTGGTTTCGGGAGTTT                            | PCR primers to amplify upstream-HPH-downstream fragment for the construction of <i>FgChs3a</i> deletion mutants   |
| P25<br>P26     | TTCAATCGCCATCTCTCGTT<br>CAAAATAGGCATTGATGTGTTGACCTCCTGTTTCTCTCAGGACGAATCA | PCR primers to amplify <i>FgChs4</i> upstream fragment for the construction of <i>FgChs4</i> deletion mutants     |
| P27            | CTCGTCCGAGGGCAAAGGAATAGAGTAGACCGATTATCCCAACAGTCAC                         | PCR primers to amplify <i>FgChs4</i> downstream fragment for the construction of                                  |

|     |                                                    |                                                                                                                 |
|-----|----------------------------------------------------|-----------------------------------------------------------------------------------------------------------------|
| P28 | TTCCAGATTGGCAATGCAAG                               | <i>FgChs4</i> deletion mutants                                                                                  |
| P29 | ACAATCAGGCTTCACACAA                                | PCR primers for identification of <i>FgChs4</i> deletion transformants                                          |
| P30 | TTCAGCATACCCAAGCAGACA                              |                                                                                                                 |
| P31 | TTCGCTCTCGTCATTGATCAC                              | PCR primers to amplify upstream-HPH-downstream fragment for the construction of <i>FgChs4</i> deletion mutants  |
| P32 | AAAGATCACGGACCAGAACCA                              |                                                                                                                 |
| P33 | TGTCCATGTATTTCGATGGCCT                             | PCR primers to amplify <i>FgChs7</i> upstream fragment for the construction of <i>FgChs7</i> deletion mutants   |
| P34 | CAAAATAGGCATTGATGTGTTGACCTCCTCTCAGCGTTAATGCCAAA    |                                                                                                                 |
| P35 | CTCGTCCGAGGGCAAAGGAATAGAGTAGGCAACGTTGTTCCATATATCG  | PCR primers to amplify <i>FgChs7</i> downstream fragment for the construction of <i>FgChs7</i> deletion mutants |
| P36 | AAGTTGTCCTGGTTCCAGAAG                              |                                                                                                                 |
| P37 | CTCAAACGAAAACGAGGAT                                | PCR primers for identification of <i>FgChs7</i> deletion transformants                                          |
| P38 | CACGGTTCAGGAAGCTCATAA                              |                                                                                                                 |
| P39 | TGCTGAAGATGGATGTGTTGT                              | PCR primers to amplify upstream-HPH-downstream fragment for the construction of <i>FgChs7</i> deletion mutants  |
| P40 | GGTAACCAATGTAGACGGTGG                              |                                                                                                                 |
| P41 | TACCATAACCCACCGAATCGT                              | PCR primers to amplify <i>FgChs5</i> upstream fragment for the construction of <i>FgChs5</i> deletion mutants   |
| P42 | CAAAATAGGCATTGATGTGTTGACCTCCTCATCTGGTCTTGTAACCCA   |                                                                                                                 |
| P43 | CTCGTCCGAGGGCAAAGGAATAGAGTAGTTCTCACAACTTGTTCCAAGGC | PCR primers to amplify <i>FgChs5</i> downstream fragment for the construction of <i>FgChs5</i> deletion mutants |
| P44 | TTCAGTTGCTGGAAGGAATG                               |                                                                                                                 |
| P45 | TTGAGACAACCTAGCCAGACCA                             | PCR primers for identification of <i>FgChs5</i> deletion transformants                                          |
| P46 | TTGCTGACGAACAAAAGGCTT                              |                                                                                                                 |
| P47 | TTGCCAGTCGTTTCCATGTC                               | PCR primers to amplify upstream-HPH-downstream fragment for the construction of <i>FgChs5</i> deletion mutants  |
| P48 | AAGAATTGTGAGCCACCGAA                               |                                                                                                                 |
| P49 | ATGCAAGACCACAGCGAAT                                | PCR primers to amplify <i>FgChs6</i> upstream fragment for the construction of <i>FgChs6</i> deletion mutants   |
| P50 | CAAAATAGGCATTGATGTGTTGACCTCCATGGACCAGTGTCCGACTTT   |                                                                                                                 |
| P51 | CTCGTCCGAGGGCAAAGGAATAGAGTAGATGGACGATCGAGAAACGTA   | PCR primers to amplify <i>FgChs6</i> downstream fragment for the construction of <i>FgChs6</i> deletion mutants |
| P52 | TAAGAGAAGAATTGCCCTCC                               |                                                                                                                 |
| P53 | GAGTCGTTATAGGCACTGGCA                              | PCR primers for identification of <i>FgChs6</i> deletion transformants                                          |
| P54 | TGTCTACTTTTCGCAACCAGCA                             |                                                                                                                 |
| P55 | TGCTTATCAATTGTAACGCGA                              | PCR primers to amplify upstream-HPH-downstream fragment for the construction of <i>FgChs6</i> deletion mutants  |
| P56 | TGCTGCAACTGCGTTACATT                               |                                                                                                                 |

|     |                                                   |                                                                                                                                                            |
|-----|---------------------------------------------------|------------------------------------------------------------------------------------------------------------------------------------------------------------|
| P57 | TTACGCATCTCTTCTCGCTGA                             | PCR primers to amplify <i>FgChs1</i> upstream fragment for the construction of <i>FgChs2</i> and <i>FgChs1</i> double genes deletion mutants               |
| P58 | CCAAAATAGCATTGATGTGTTGACCTCCTACAGCTGCGTTGAGGCTCA  |                                                                                                                                                            |
| P59 | CTATCGCCTTCTTGACGAGTTCTTCTGAGACTTGGATGCGCAATATCA  | PCR primers to amplify <i>FgChs1</i> downstream fragment for the construction of <i>FgChs2</i> and <i>FgChs1</i> double genes deletion mutants             |
| P60 | CTTTGCAAACCTCCTTCACCTC                            |                                                                                                                                                            |
| P61 | TCTGTGCATTCATCGTACCA                              | PCR primers to amplify <i>FgChs1</i> up- <i>NEO</i> -down fragment for the construction of <i>FgChs2</i> and <i>FgChs1</i> double genes deletion mutants   |
| P62 | TTTTGCGGGATGTTATGTGG                              |                                                                                                                                                            |
| P63 | TTCAATTGCCTTCAGACGAC                              | PCR primers for identification <i>FgChs2</i> and <i>FgChs1</i> double genes deletion transformants                                                         |
| P64 | ATCCAAAGAAGGACAACACCG                             |                                                                                                                                                            |
| P65 | GGATGGAGGGATGGAAATGTA                             | PCR primers to amplify <i>FgChs3a</i> upstream fragment for the construction of <i>FgChs2</i> and <i>FgChs3a</i> double genes deletion mutants             |
| P66 | CCAAAATAGCATTGATGTGTTGACCTCCTGTACGGTGCATGACGGAAA  |                                                                                                                                                            |
| P67 | CTATCGCCTTCTTGACGAGTTCTTCTGACCCATGTATTTCCGTTTCCT  | PCR primers to amplify <i>FgChs3a</i> downstream fragment for the construction of <i>FgChs2</i> and <i>FgChs3a</i> double genes deletion mutants           |
| P68 | TCGGAAGTTTCACATTCAAAG                             |                                                                                                                                                            |
| P69 | AAAGAACGAGGTTTCTTGCCA                             | PCR primers to amplify <i>FgChs3a</i> up- <i>NEO</i> -down fragment for the construction of <i>FgChs2</i> and <i>FgChs3a</i> double genes deletion mutants |
| P70 | TTCGAGTGGTTTCGGGAGTTT                             |                                                                                                                                                            |
| P71 | TCATTATCCTCCTGACCTCCA                             | PCR primers for identification <i>FgChs2</i> and <i>FgChs3a</i> double genes deletion transformants                                                        |
| P72 | AAGACATTCATCCCCAAGAAG                             |                                                                                                                                                            |
| P73 | TTCAATCGCCATCTCTCGTT                              | PCR primers to amplify <i>FgChs4</i> upstream fragment for the construction of <i>FgChs2</i> and <i>FgChs4</i> double genes deletion mutants               |
| P74 | CCAAAATAGCATTGATGTGTTGACCTCCTGTTTCTCTCAGGACGAATCA |                                                                                                                                                            |
| P75 | CTATCGCCTTCTTGACGAGTTCTTCTGAACCGATTATCCCAACAGTCAC | PCR primers to amplify <i>FgChs4</i> downstream fragment for the construction of <i>FgChs2</i> and <i>FgChs4</i> double genes deletion mutants             |
| P76 | TTCCAGATTGGCAATGCAAG                              |                                                                                                                                                            |
| P77 | TTCGCTCTCGTCATTGATCAC                             | PCR primers to amplify <i>FgChs4</i> up- <i>NEO</i> -down fragment for the construction of <i>FgChs2</i> and <i>FgChs4</i> double genes deletion mutants   |
| P78 | AAAGATCACGGACCAGAACCA                             |                                                                                                                                                            |
| P79 | ACAATCAGGCTTCACACCAA                              | PCR primers for identification <i>FgChs2</i> and <i>FgChs4</i> double genes deletion transformants                                                         |
| P80 | TTCAGCATACCCAAGCAGACA                             |                                                                                                                                                            |
| P81 | TGTCCATGTATTTCGATGGCCT                            | PCR primers to amplify <i>FgChs7</i> upstream fragment for the construction of <i>FgChs2</i> and <i>FgChs7</i> double genes deletion mutants               |
| P82 | CCAAAATAGCATTGATGTGTTGACCTCCTCTCAGCGTTAATGCCAAA   |                                                                                                                                                            |
| P83 | CTATCGCCTTCTTGACGAGTTCTTCTGAGCAACGTTGTTCCATATATCG | PCR primers to amplify <i>FgChs7</i> downstream fragment for the construction of <i>FgChs2</i> and <i>FgChs7</i> double genes deletion mutants             |
| P84 | AAGTTGTCCTGGTTCCAGAAG                             |                                                                                                                                                            |
| P85 | TGCTGAAGATGGATGTGTTGT                             | PCR primers to amplify <i>FgChs7</i> up- <i>NEO</i> -down fragment for the construction of                                                                 |



|      |                                                   |                                                                                                                                                          |
|------|---------------------------------------------------|----------------------------------------------------------------------------------------------------------------------------------------------------------|
| P86  | GGTAACCAATGTAGACGGTGG                             | <i>FgChs2</i> and <i>FgChs7</i> double genes deletion mutants                                                                                            |
| P87  | CTCCAAACGAAAACGAGGAT                              | PCR primers for identification <i>FgChs2</i> and <i>FgChs7</i> double genes deletion transformants                                                       |
| P88  | CACGGTTCAGGAAGCTCATAA                             |                                                                                                                                                          |
| P89  | TACCATAACCCACCGAATCGT                             | PCR primers to amplify <i>FgChs5</i> upstream fragment for the construction of <i>FgChs2</i> and <i>FgChs5</i> double genes deletion mutants             |
| P90  | CCAAAATAGCATTGATGTGTTGACCTCCTCATCTTGGTCTTGTAACCCA |                                                                                                                                                          |
| P91  | CTATCGCCTTCTTGACGAGTTCTTCTGATTCTCACAACCTTGCCAAGGC | PCR primers to amplify <i>FgChs5</i> downstream fragment for the construction of <i>FgChs2</i> and <i>FgChs5</i> double genes deletion mutants           |
| P92  | TTCAGTTGCTGGAAGGAATG                              |                                                                                                                                                          |
| P93  | TTGCCAGTCGTTTCCATGTC                              | PCR primers to amplify <i>FgChs5</i> up- <i>NEO</i> -down fragment for the construction of <i>FgChs2</i> and <i>FgChs5</i> double genes deletion mutants |
| P94  | AAGAATTGTGAGCCACCGAA                              |                                                                                                                                                          |
| P95  | TTGAGACAACACTAGCCAGACCA                           | PCR primers for identification <i>FgChs2</i> and <i>FgChs5</i> double genes deletion transformants                                                       |
| P96  | TTGCTGACGAACAAAGGCTT                              |                                                                                                                                                          |
| P97  | ATGCAAGACCACAGCGAAT                               | PCR primers to amplify <i>FgChs6</i> upstream fragment for the construction of <i>FgChs2</i> and <i>FgChs6</i> double genes deletion mutants             |
| P98  | CCAAAATAGCATTGATGTGTTGACCTCCATGGACCAGTGTTCGGACTTT |                                                                                                                                                          |
| P99  | CTATCGCCTTCTTGACGAGTTCTTCTGAATGGACGATCGAGAAACGTA  | PCR primers to amplify <i>FgChs6</i> downstream fragment for the construction of <i>FgChs2</i> and <i>FgChs6</i> double genes deletion mutants           |
| P100 | TAAGAGAAGAATTGCCCTCC                              |                                                                                                                                                          |
| P101 | TGCTTATCAATTGTAACGCGA                             | PCR primers to amplify <i>FgChs6</i> up- <i>NEO</i> -down fragment for the construction of <i>FgChs2</i> and <i>FgChs6</i> double genes deletion mutants |
| P102 | TGCTGCAACTGCGTTACATT                              |                                                                                                                                                          |
| P103 | GAGTCGTTATAGGCACTGGCA                             | PCR primers for identification <i>FgChs2</i> and <i>FgChs6</i> double genes deletion transformants                                                       |
| P104 | TGTCTACTTTCGCAACCAGCA                             |                                                                                                                                                          |
| P105 | TATCGACGATCGGCATGTAT                              | PCR primers for amplification of the partial <i>FgChs2</i> gene in quantitative real-time PCR assays                                                     |
| P106 | AGCTCGACAGTCTCACCTT                               |                                                                                                                                                          |
| P107 | ATGTGCTGGTTCTGGGCTAT                              | PCR primers for amplification of the partial <i>FgChs1</i> gene in quantitative real-time PCR assays                                                     |
| P108 | ATACTGGGCGAATGATGTGA                              |                                                                                                                                                          |
| P109 | CCAACATTGTCAAGGATGAGA                             | PCR primers for amplification of the partial <i>FgChs3a</i> gene in quantitative real-time PCR assays                                                    |
| P110 | CACCGAGAGAGCTAAAGTCGT                             |                                                                                                                                                          |
| P111 | TCTACCTGCTTGCAATTGCC                              | PCR primers for amplification of the partial <i>FgChs4</i> gene in quantitative real-time PCR assays                                                     |
| P112 | ACTTCTTGACCGCTTGTCG                               |                                                                                                                                                          |
| P113 | TCGTTATCTCACCCCTGA                                | PCR primers for amplification of the partial <i>FgChs7</i> gene in quantitative real-time PCR assays                                                     |
| P114 | AAACACAACGAAGCGCATAAC                             |                                                                                                                                                          |

|         |                                                              |                                                                                                       |
|---------|--------------------------------------------------------------|-------------------------------------------------------------------------------------------------------|
| P115    | AGGCTCAAGGACCCTTCTCT                                         | PCR primers for amplification of the partial <i>FgChs5</i> gene in quantitative real-time PCR assays  |
| P116    | AACTCTTGCTTGATGCCCTT                                         |                                                                                                       |
| P117    | GATGGACATAAGCGCCAAC                                          | PCR primers for amplification of the partial <i>FgChs6</i> gene in quantitative real-time PCR assays  |
| P118    | CTGAATGTGCATGAGGGAAG                                         |                                                                                                       |
| P119    | AAGTCGAGAAGGAGCAGGAG                                         | PCR primers for amplification of the partial <i>FgChs3b</i> gene in quantitative real-time PCR assays |
| P120    | CTTTCGTTCTGTGGCAGGT                                          |                                                                                                       |
| P121    | ACTCACTATAGGGCGAATTGGGTACTCAAATTGGTTAGAGGAACACTACGACCCTCA    | PCR primers to amplify the entire <i>FgChs2</i> gene for the construction of complemented plasmid     |
| P122    | CACCACCCCGGTGAACAGCTCCTCGCCCTTGCTCACATTGCGTAGGTTGCTTGA<br>CA |                                                                                                       |
| P123    | TGCGCTTCCTTCTCTGGT                                           | PCR primers for identification of the complementation of <i>FgChs2</i> deletion mutants               |
| P124    | TCAGCTTGCCGTAGGTGGCA                                         |                                                                                                       |
| P125    | CAACACCTTCTCCTCTCAACC                                        | PCR primers for amplification of <i>FgChs2</i> upstream fragment for Southern hybridization assay     |
| P126    | TTGTCGGGATCTTACACTCCA                                        |                                                                                                       |
| hph-F   | GGAGGTCAACACATCAATGCCTATT                                    | PCR primers for amplification of hygromycin resistance gene ( <i>HPH</i> ) and <i>HPH</i> probe       |
| hph-R   | CTACTCTATTCTTTGCCCT                                          |                                                                                                       |
| neo-F   | GGAGGTCAACACATCAATGCT                                        | PCR primers for amplification of neomycin resistance gene ( <i>NEO</i> ) and <i>NEO</i> probe         |
| neo-R   | TCAGAAGAAGTTCGTCAAGAAG                                       |                                                                                                       |
| Actin-F | ATCCACGTCACCACTTTCAA                                         | PCR primers for amplification of the reference <i>ACTIN</i> gene in quantitative real-time PCR assays |
| Actin-R | TGCTTGGAGATCCACTTTG                                          |                                                                                                       |
| Tri4-F  | ACGTGTGGCTACTCAGGAGAA                                        | PCR primers for amplification of the <i>TRI4</i> gene in quantitative real-time PCR assays            |
| Tri4-R  | TGGAATTGCCTTGGGGTA                                           |                                                                                                       |
| Tri5-F  | AGCAGATGGTTGCTGTCTTCT                                        | PCR primers for amplification of the <i>TRI5</i> gene in quantitative real-time PCR assays            |
| Tri5-R  | TTCTGAGCCTCCTCACATCG                                         |                                                                                                       |
| Tri6-F  | AAATGCCATTCCCTAGTTG                                          | PCR primers for amplification of the <i>TRI6</i> gene in quantitative real-time PCR assays            |
| Tri6-R  | ATCTCGCATGTTATCCACCCT                                        |                                                                                                       |
